# Supplementary material
Source: bioRxiv or medRxiv preprint supplement (https://www.biorxiv.org/highwire/filestream/66049/field_highwire_adjunct_files/6/216754-6.pdf)
Supplement: Supplementary file [file 216754-6.pdf]

Supplementary Figure 6

### Bladder cancer

### Head and neck cancer

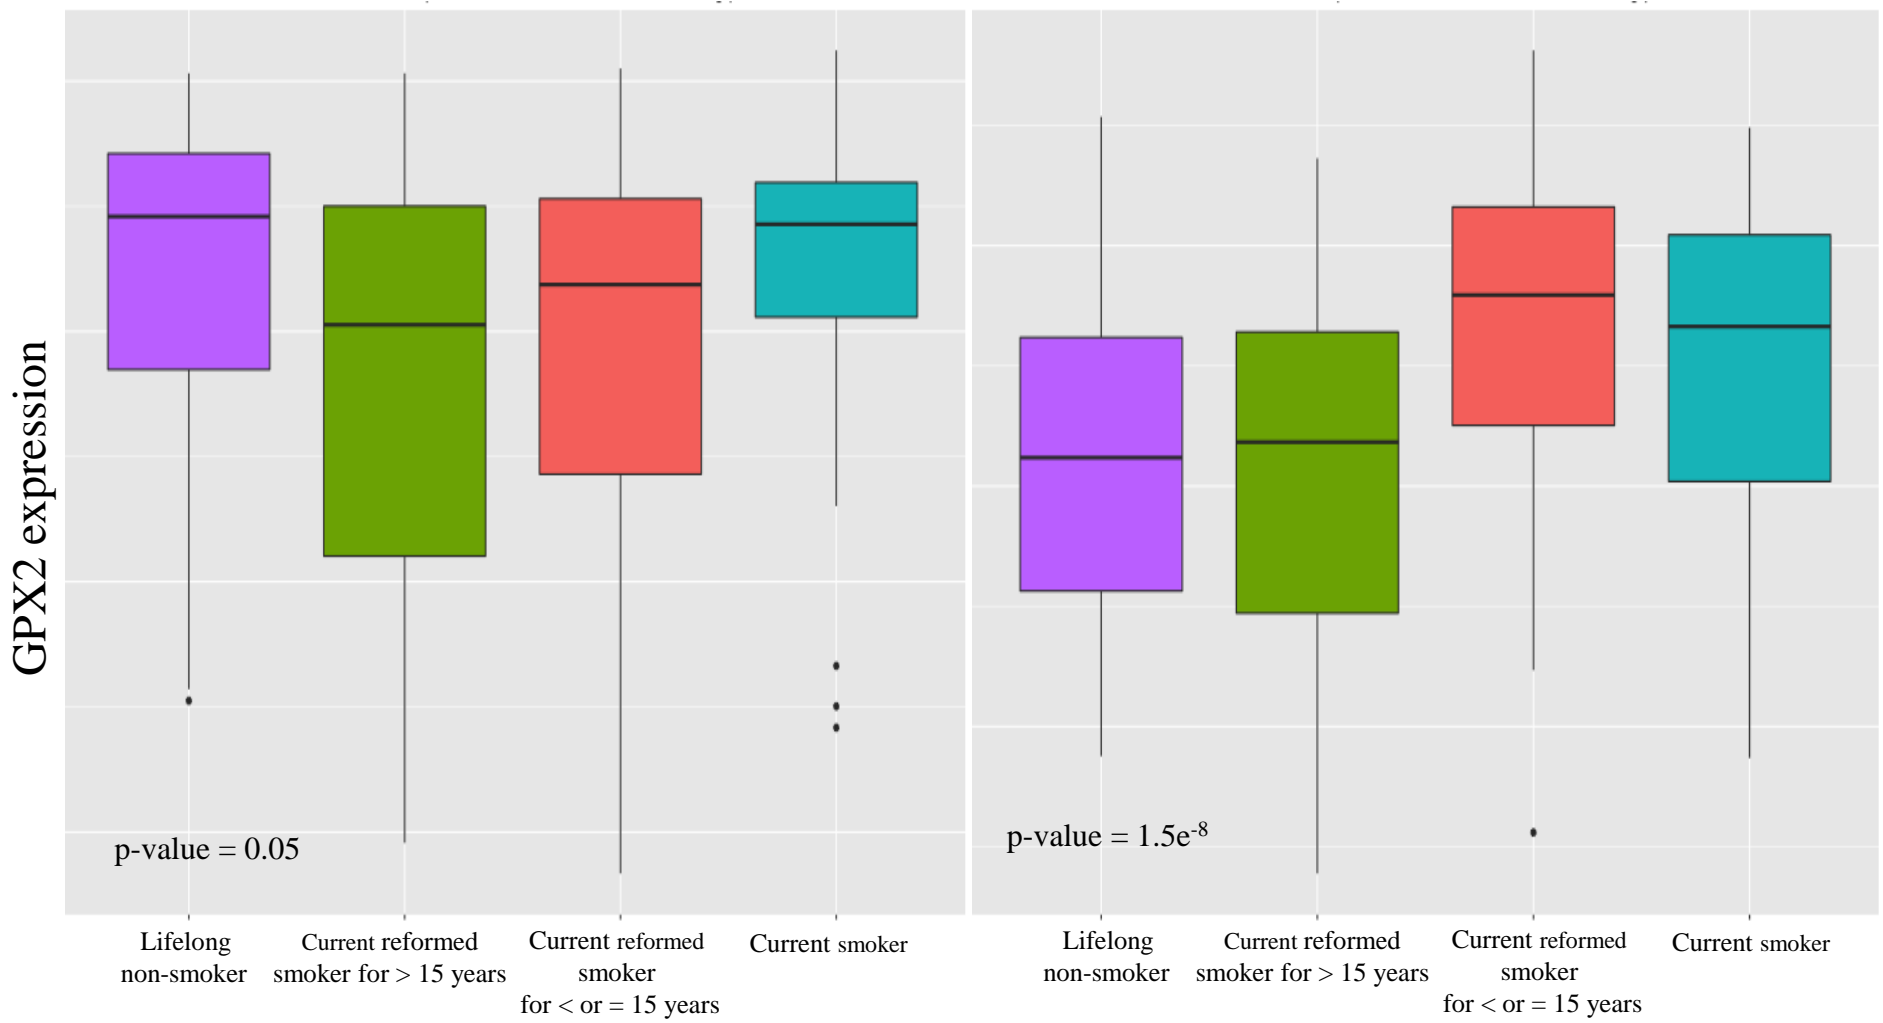

**Smoking profile**

-  Lifelong non-smoker
-  Current reformed smoker for > 15 years
-  Current reformed smoker for < or = 15 years
-  Current smoker
